# Supplementary material for: Graphene Oxide promotes embryonic stem cell differentiation to haematopoietic lineage
Source: PubMed Central journal article supplement (PMC4873758; doi:10.1038/srep25917), 2016-05-20
Supplement: srep25917-s1.pdf [file srep25917-s1.pdf]

## **Graphene Oxide promotes embryonic stem cell differentiation to haematopoietic lineage**

Eva Garcia-Alegria<sup>1</sup>, Maria Iluit<sup>2</sup>, Monika Stefanska<sup>3</sup>, Claudio Silva<sup>2</sup>, Sebastian Heeg<sup>2</sup>, Susan J. Kimber<sup>4</sup>, Valerie Kouskoff<sup>1\*</sup>, Georges Lacaud<sup>3\*</sup>, Aravind Vijayaraghavan<sup>2\*</sup>, and Kiran Batta<sup>3\*</sup>

### **Supplementary material and methods:**

**Figure S1:** (A) Photograph of glass cover slip uncoated (left) and coated (right) with GO (B) Dark field optical micrograph and (C) atomic force micrograph of GO coating on cover slip demonstrating uniformity of coverage. (D) AFM image of a scratch marked across the GO coating to measure coating height (inset).

**Figure S2:** (A) SEM image of GO flakes spin-coated on a SiO<sub>2</sub> substrate to measure lateral dimension distribution, and a bottle of GO dispersion (inset). (B) AFM image of individual GO flake showing monolayer thickness.

**Figure S3:** (A) XPS spectrum of the C1s core level showing components, (B) Raman spectrum showing G- and D- peaks and (C) UV-Vis-NIR absorption spectrum showing the  $\pi$  and  $\pi^*$  transitions of GO.

**Figure S4:** (A) 8 additional AFM images and (B) 5 additional SEM images of GO flakes spin-coated on to SiO<sub>2</sub> substrate.

**A**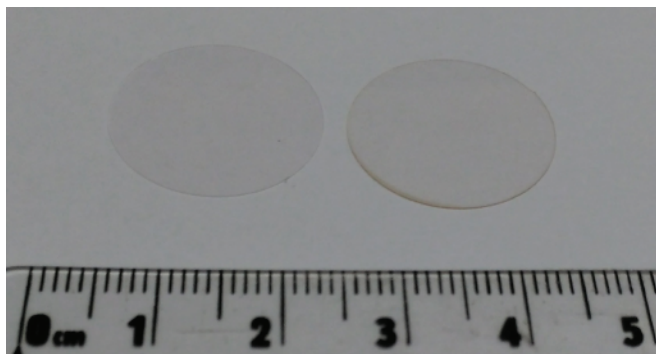**B**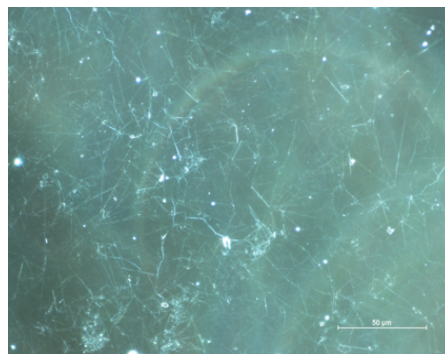**C**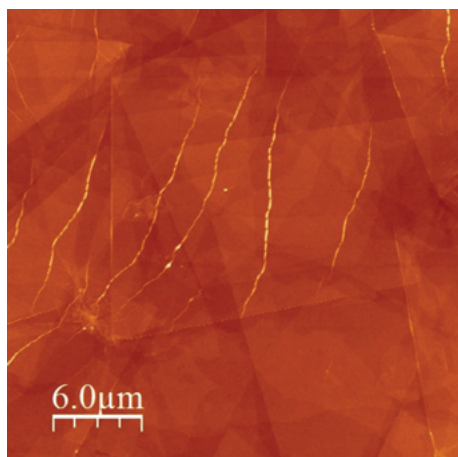**D**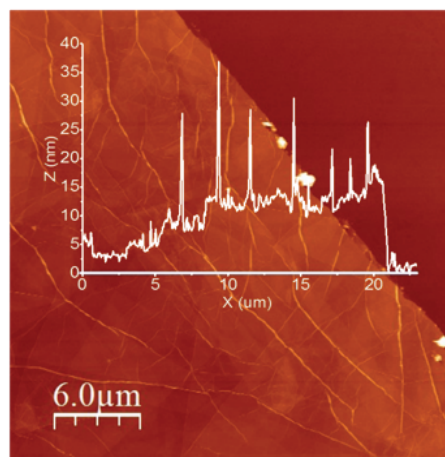

S. Figure 1

**A**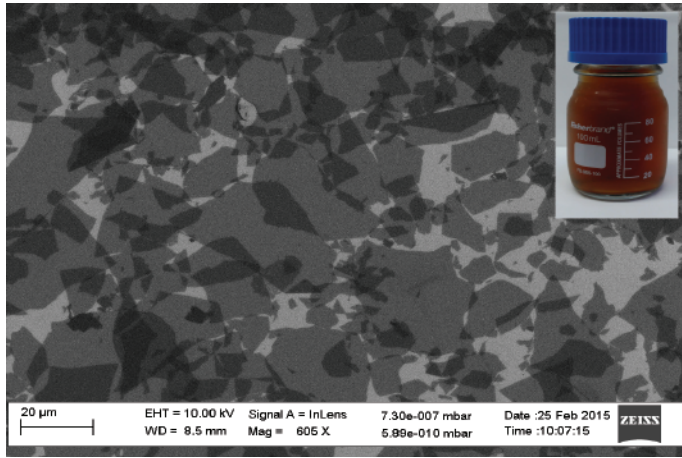**B**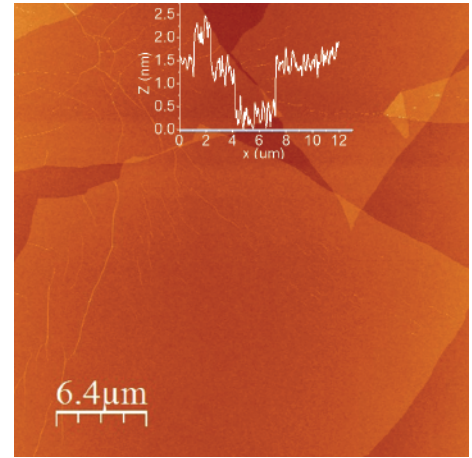

S. Figure 2

**A**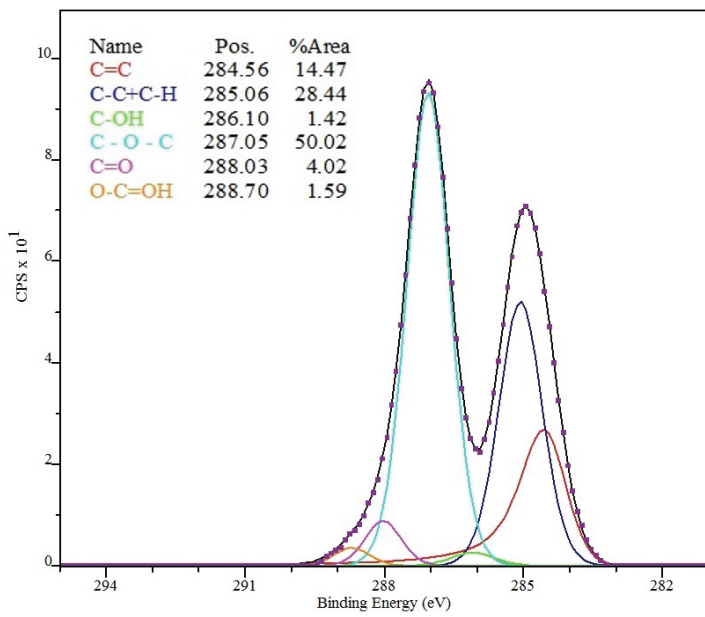**B**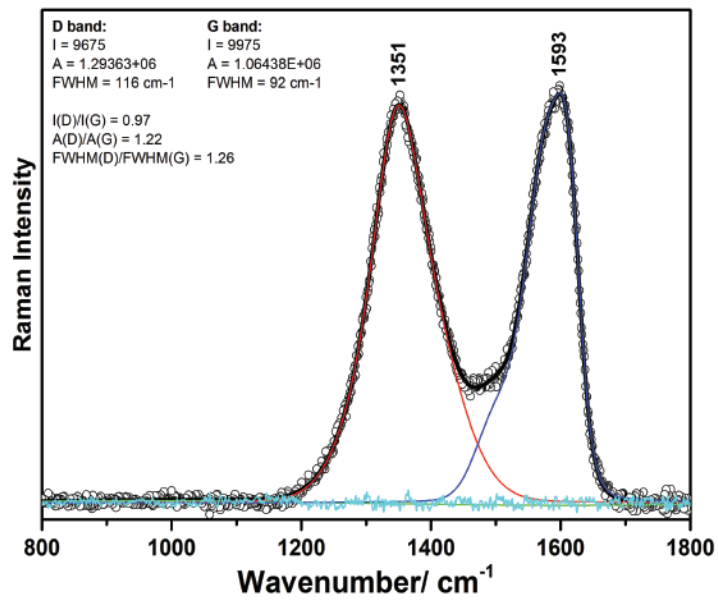**C**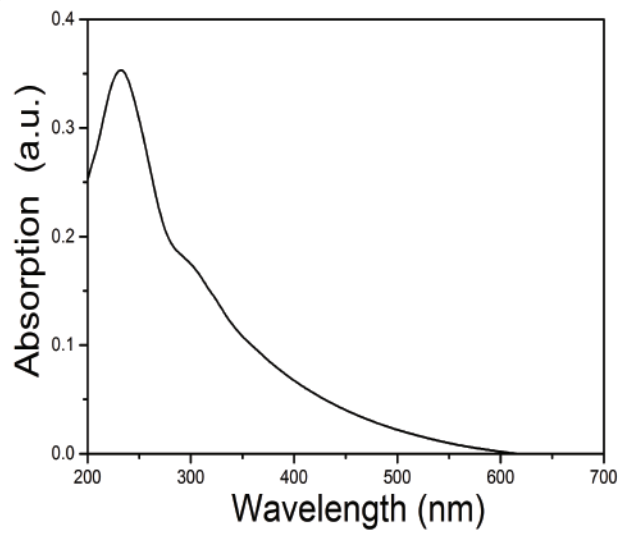

S. Figure 3

**A**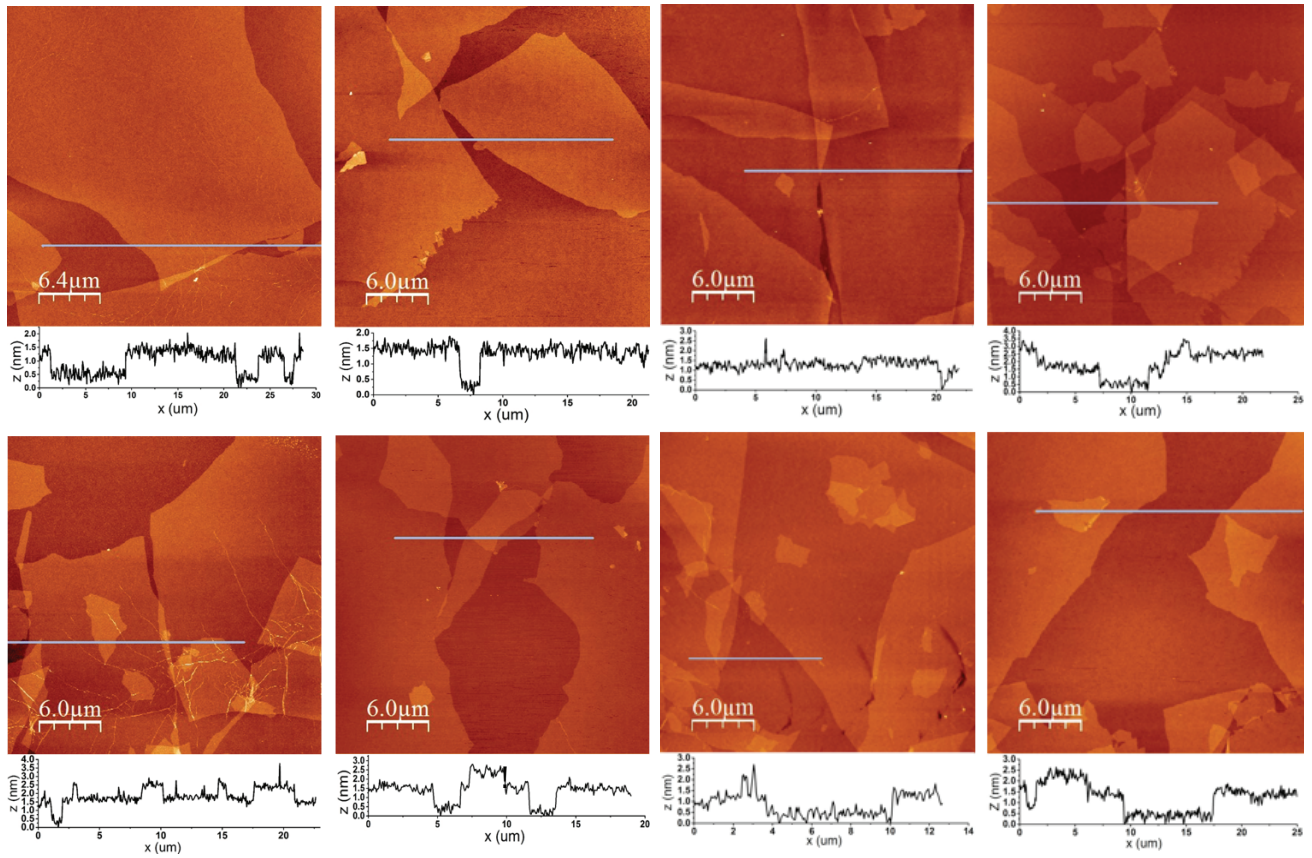**B**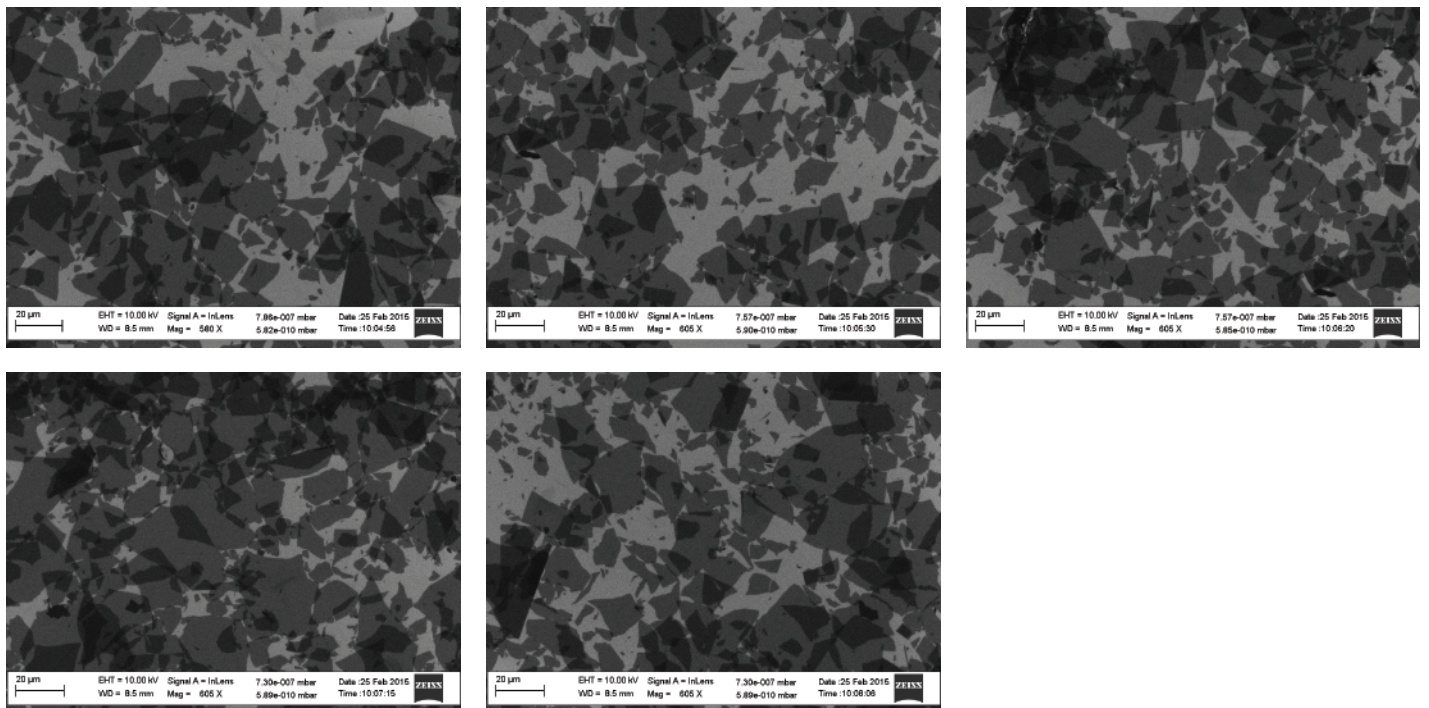

S. Figure 4
